# Supplementary material for: The Association Between Polycystic Ovary Syndrome and Metabolic Syndrome in Adolescents: a Systematic Review and Meta-analysis
Source: PubMed Central journal article supplement (PMC9810687; doi:10.1007/s43032-022-00864-8), 2022-02-02
Supplement: 43032_2022_864_MOESM1_ESM.pdf [file 43032_2022_864_MOESM1_ESM.pdf]

## Supplementary figures

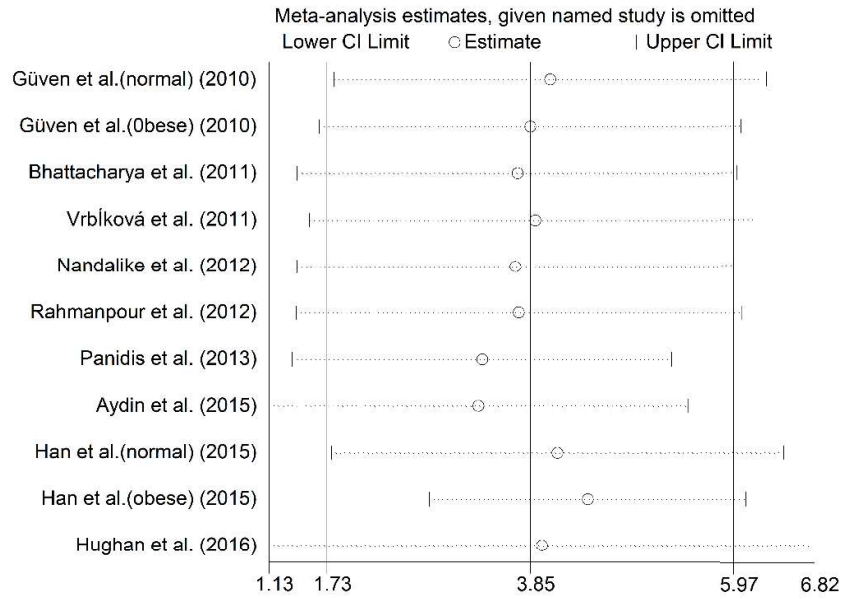

**Fig. S1 Sensitivity analysis of SBP level in adolescents with and without PCOS**

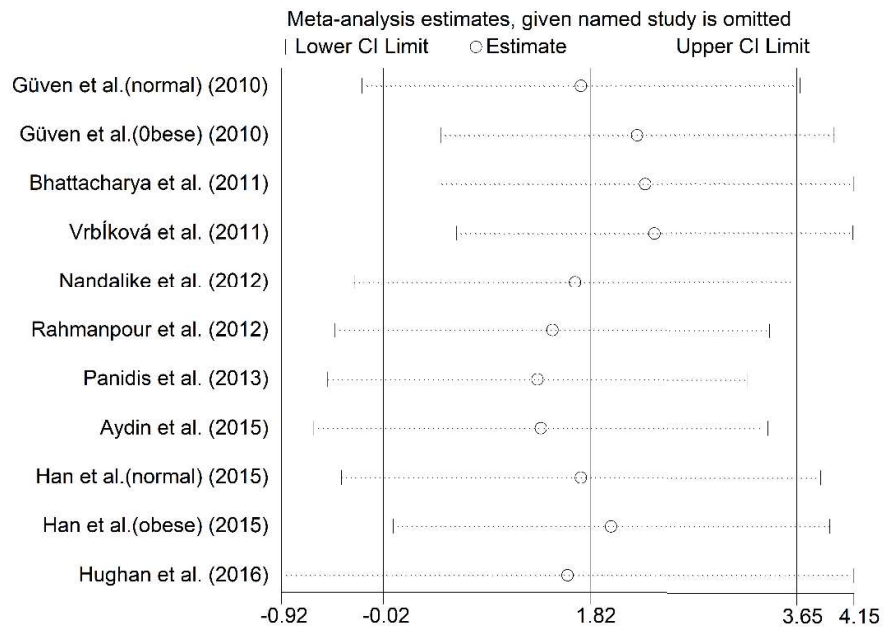

**Fig. S2 Sensitivity analysis of DBP level in adolescents with and without PCOS**

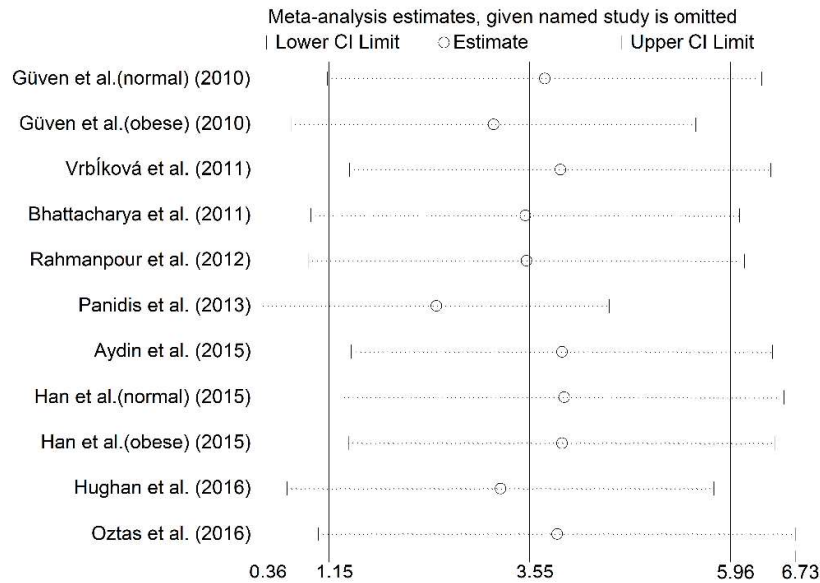

**Fig. S3 Sensitivity analysis of WC in adolescents with and without PCOS**

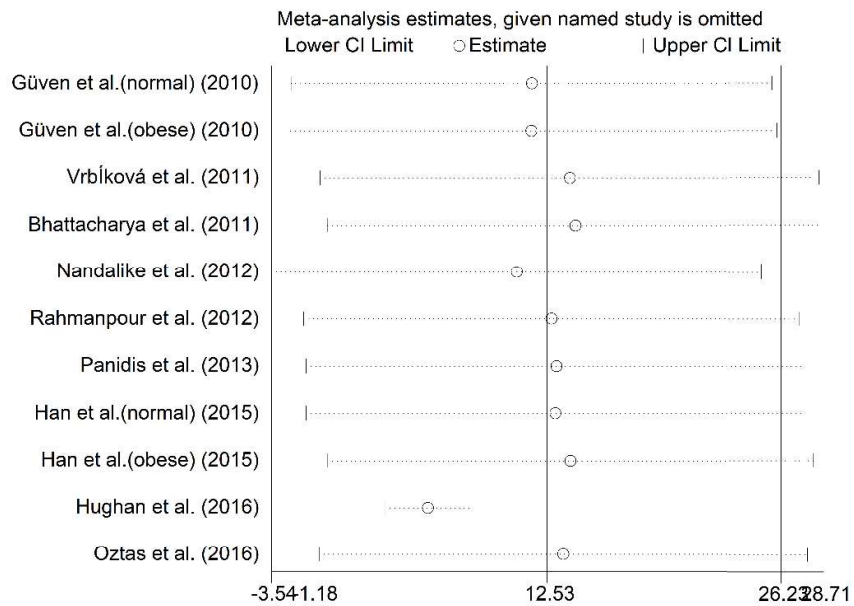

**Fig. S4 Sensitivity analysis of TG in adolescents with and without PCOS**

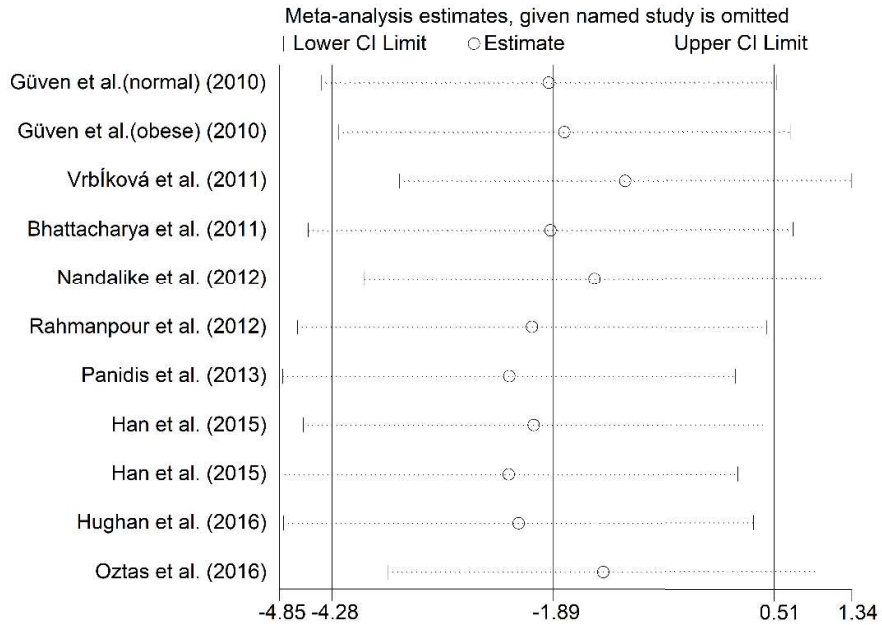

**Fig. S5 Sensitivity analysis of HDL in adolescents with and without PCOS**

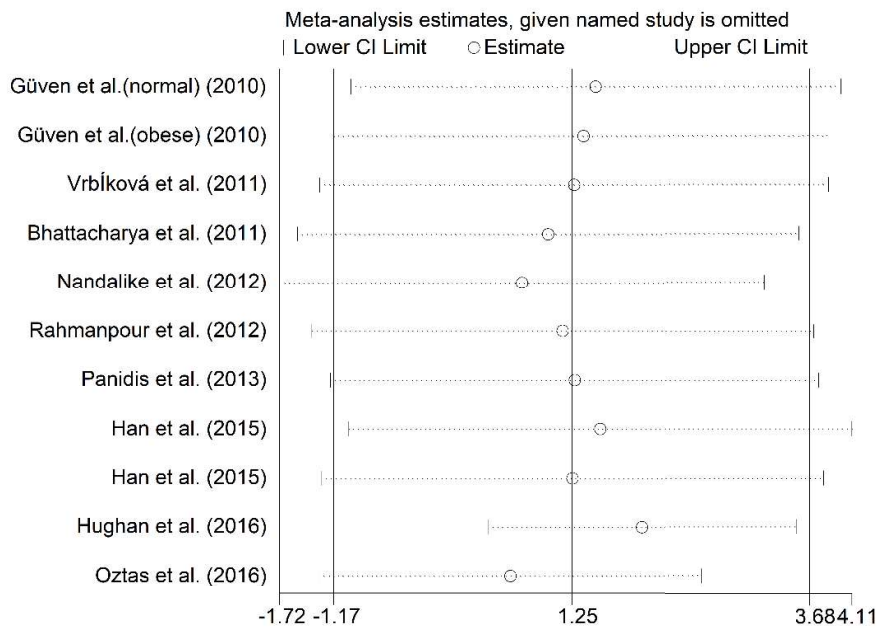

**Fig. S6 Sensitivity analysis of FBG in adolescents with and without PCOS**
